# Supplementary material for: miR-139-5p Loss-Mediated WTAP Activation Contributes to Hepatocellular Carcinoma Progression by Promoting the Epithelial to Mesenchymal Transition
Source: PubMed Central journal article supplement (PMC8083052; doi:10.3389/fonc.2021.611544), 2021-04-15
Supplement: Image_2.pdf [file Image_2.pdf]

## Supplementary Figure S2

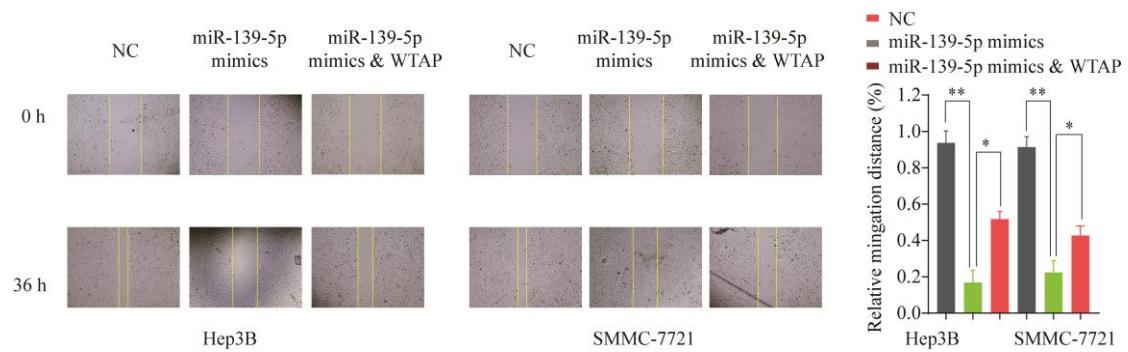

**Figure S2** Hep 3B or SMMC-7721 cells were transfected with NC, miR-139-5p mimics or miR-139-5p mimics & WTAP overexpression plasmid. Cell migration capability of Hep 3B or SMMC-7721 cells in different groups was analyzed by transwell assay. \* $p < 0.05$ , \*\* $p < 0.01$ .
